# Supplementary material for: Retinoic acid signaling is directly activated in cardiomyocytes and protects mouse hearts from apoptosis after myocardial infarction
Source: eLife. 2021 Oct 8;10:e68280. doi: 10.7554/eLife.68280 (PMC8530512; doi:10.7554/eLife.68280)
Supplement: Figure 2—source data 1. [file elife-68280-fig2-data1.xlsx]

## Sheet: Sheet1
	Source data for Figure 2I
	Primary cardiomyocytes treated with RA
	Cells isolated with Miltenyi kit
	Each replicate is an independent well	GFP+ cells (%)	GFP+ cells (%)	GFP+ cells (%)	GFP+ cells (%)	GFP+ cells (%)	GFP+ cells (%)	GFP+ cells (%)	GFP+ cells (%)	GFP+ cells (%)	GFP+ cells (%)	GFP+ cells (%)	GFP+ cells (%)	GFP+ cells (%)
	RA concentration	Replicate 1	Replicate 2	Replicate 3	Replicate 4	Replicate 5	Replicate 6	Replicate 7	Replicate 8	Replicate 9	Replicate 10	Replicate 11	Replicate 12	Replicate 13
	0	0	1.192	1.85185	0	1.12373	0.709656	0.071102	0.58309	1.43677	1.61088	1.68289	0.183308	1.94735
	0.1	1.66667	5.19995	4.01515	2.21099	5.58799	0.886204	3.43279	1.773	1.57342	0.382591	1.12478	1.21164	2.84709
	0.25	2.18615	2.05317	4.26587	9.76008	15.2845	8.52914	10.2952	10.4232	4.03458	5.34503	5.29974	5.84116	4.85294
	0.5	11.3415	11.7842	17.6107	15.1427	19.8577	11.2712	11.0273	13.0182	12.0611	9.67911	10.0579	16.0215	13.0086
	0.75	10.0338	15.2162	12.4678	13.1631	18.1719	18.4429	17.2177	13.9769	21.155	15.5471	15.3348	11.1022	10.3971
	1	12.9533	23.4621	21.9383	10.7868	16.7117	17.9588	15.9207	12.7787	15.3421	8.37	16.1553	13.9531	22.3063
	5	17.2473	27.9131	26.7342	19.3961	18.8483	23.4535	18.3718	22.5758	26.3545	18.7912	18.3447	28.6451	27.1854
	10	17.0604	26.5183	24.1309	19.6137	18.809	21.5179	18.8097	18.9051	28.6834	34.3598	17.421	28.8065	23.9386
	25					20.0615	18.6975	20.8756	26.9227	24.7008	30.0888	23.5504	26.6187	18.0482
	100					23.6852	21.6572	22.4513	22.5452	39.2975	20.5556	34.0204	25.5057	36.1844
	500					26.9184	21.2744	27.6636	25.121	26.9088	24.0494	23.4504	24.8539	20.9066
	1000					23.4902	29.8632	26.3531	24.433	32.15	38.4853	22.3398	22.4323	36.2398
