# Supplementary material for: Retinoic acid signaling is directly activated in cardiomyocytes and protects mouse hearts from apoptosis after myocardial infarction
Source: eLife. 2021 Oct 8;10:e68280. doi: 10.7554/eLife.68280 (PMC8530512; doi:10.7554/eLife.68280)
Supplement: Figure 5—figure supplement 3—source data 1. [file elife-68280-fig5-figsupp3-data1.xlsx]

## Sheet: Sheet1
Phospho-ERK quantification Supplement figure 5B
P-ERK QUANT					P-ERK QUANT					P-ERK QUANT
9491CTL	P-ERK pixel area	Total Area	%		9492CTL	P-ERK pixel area	Total Area	%		9598CTL	P-ERK pixel area	AREA	%
slide 1	66.069	1818.35	3.63347		slide 1	98.677	2055	4.8018		slide 1	9.78	424.545	2.30364	lower resolution
slide 3	11.909	448.367	2.65608		slide 3	104	2123	4.89873		slide 3	71.215	2231	3.19207
slide 5	23.143	1817.79	1.27314		slide 5	65.855	2441	2.69787		slide 5	112.367	2411	4.6606
slide 7	22.702	1705	1.3315		slide 7	30.697	2740	1.12033		slide 7	81.225	1672	4.85795
					slide 9	68.97	2978	2.31598		slide 9	174.374	2757	6.32477
P-ERK QUANT					P-ERK QUANT					P-ERK QUANT
9490KO	P-ERK pixel area	Total Area	%		10095KO	P-ERK pixel area	Total Area	%		10231KO	P-ERK pixel area	Total Area	%
slide 1	49.399	416.464	11.8615		slide 1	8.596	474.679	1.81091	lower resolution	slide 1	76.937	2552.57	3.01409
slide 3	26.01	960	2.70938		slide 3	26.545	1923	1.3804		slide 3	65.741	1746	3.76523
slide 5	25.121	634	3.9623		slide 5	15.413	1574	0.979225		slide 5	51.131	1539	3.32235
slide 7	28.209	868.83	3.24678		slide 7	79.428	2175	3.65186		slide 7	26.879	3762	0.714487
					slide 9	46.03	1596	2.88409		slide 9	29.84	3795	0.786298
Each slide 3-5 sections
	Average			Average
9491CTL	2.22355		9490KO	5.445
9492CTL	2.75823		10095KO	2.22389
9598CTL	4.75885		10231KO	2.14709
	PERK
CTL	3.24687
RAKO	3.27199
SEM
CTL	0.771583
RAKO	1.08673
ttest	0.985958
