# Supplementary material for: Retinoic acid signaling is directly activated in cardiomyocytes and protects mouse hearts from apoptosis after myocardial infarction
Source: eLife. 2021 Oct 8;10:e68280. doi: 10.7554/eLife.68280 (PMC8530512; doi:10.7554/eLife.68280)
Supplement: Figure 5—source data 1. [file elife-68280-fig5-data1.xlsx]

## Sheet: Sheet1
	Sirius red quantification Figure 5E
	Month sacrificed (2016)	MARCH					MARCH					MARCH					JUNE					JUNE					JUNE					OCT					2017-01-01						2017-01-01					2017-01-01
	animal number	7840ctl	LV area	Infarct area	%		8288ctl	LV area	Infarct area	%		8296ctl	LV area	Infarct area	%		9598ctl	LV area	Infarct area	%		9492ctl	LV area	Infarct area	%		9491ctl	LV area	Infarct area	%		10661ctl	LV area	Infarct area	%		10723ctl	LV area	Infarct area	%			11272ctl	LV area	Infarct area	%		11274ctl	LV area
	slide number	1	21002555	5470227	26.0455		1	26644273	4700873	17.6431		1	21083274	989208	4.69191		1	340.8	161.374	47.3515		2	539.988	124.255	23.0107		1	364.086	44.183	12.1353		1	592.632	191.99	32.3962		1	12640496	2438296	19.2896			1	9427206	2193212	23.2647		1	7546856
	slide number	3	22190664	7292615	32.8634		5	29736843	6762162	22.74		3	21903615	1986643	9.06993		4	418.523	184.347	44.047		4	554.728	138.003	24.8776		4	392.657	30.025	7.64662		2	604.59	215.648	35.6685		5	10917378	2011974	18.4291			6	10071900	2390990	23.7392		5	9655628
	slide number	5	24171380	4925601	20.3778		8	30322340	5102956	16.829		5	25931879	2405424	9.27593		6	457.166	193.84	42.4004		7	488.099	98.666	20.2143		6	438.208	45.936	10.4827		9	617.418	243.126	39.3779		9	8848832	747136	8.44333			9	9698528	2060852	21.2491		9	9434888
	slide number	7	26280236	2649103	10.0802		10	23432993	7154527	30.5319		7	21754817	1871817	8.60415		9	322.851	149.023	46.1584		11	519.076	123.112	23.7175		9	418.954	43.485	10.3794		13	609.248	239.255	39.2705		7	11013580	2380068	21.6103			11	9377320	2071336	22.0888		11	9335772
	slide number	9	29104917	3064344	10.5286		13	1014.53	172.594	17.0121		9	873.971	186.994	21.3959		11	332.134	140.025	42.1592		19	1147.1	278.911	24.3144		11	772.465	75.354	9.75501		17	1379.8	592.456	42.9379		19	9169244	884732	9.64891			14	9865460	1827680	18.526		14	8462564
	slide number	11	10009426	2221724	22.1963		15	12475897	3228648	25.8791		11	11461550	1638070	14.2919		15	7707780	3558929	46.1732		21	10829500	4030757	37.2202		19	10279128	2775752	27.0038		20	11624083	4095766	35.2352		13	12633414	3069266	24.2948			18	9377388	2378142	25.3604		21	7193288
	Month sacrificed	MARCH					MARCH					MARCH					JUNE					AUG					AUG					OCT						JUNE					2017-01-01					2017-01-01
	animal number	8290ko	LV area	Infarct area	%		7836ko	LV area	Infarct area	%		8039ko	LV area	Infarct area	%		9490ko	LV area	Infarct area	%		10095ko	LV area	Infarct area	%		10231ko	LV area	Infarct area	%		10033ko	LV area	Infarct area	%			8295koNEWsections	LV area	Infarct area	%		11269kodead	LV area	Infarct area	%		11270kodead	LV area
	slide number	2	29656784	6665792	22.4764		4	28339997	11540600	40.722		3	26315633	12635682	48.0159		1	422.171	62.412	14.7836		1	257.1	148.211	57.6472		2	280.86	163.416	58.1841		1	518.264	136.308	26.3009			1	9588694	2203008	22.9751		1	8537288	1451528	17.0022		1	10229992
	slide number	8	30397151	11091606	36.489		6	25851505	10249379	39.6471		8	35367204	10959390	30.9874		3	488.117	199.852	40.9435		5	329.855	166.962	50.6168		4	344.505	189.571	55.0271		3	530.876	135.539	25.5312			6	8703416	3021552	34.7169		9	9867516	1475036	14.9484		5	9604236
	slide number	12	30090993	9677852	32.162		12	21362822	10220324	47.8416		12	30786679	10512989	34.1479		9	472.812	194.679	41.1747		7	340.921	168.892	49.5399		7	392.935	249.532	63.5047		9	504.485	155.834	30.8897			9	8101240	2992780	36.9422		11	10160244	2075900	20.4316		7	9696542
	slide number	16	25378663	4418186	17.4091		14	10211868	4880740	47.7948		17	29545478	13579046	45.9598		13	451.774	161.779	35.8097		9	341.763	174.742	51.1296		11	418.485	250.875	59.9484		13	483.07	143.642	29.7352			11	8343330	3099336	37.1475		15	8162292	985308	12.0715		10	10039002
	slide number	18	36348271	11567481	31.824		18	20573722	4066618	19.7661		23	10679189	5033171	47.1306		17	985.192	307.901	31.2529		13	567.52	285.516	50.3094		19	871.39	452.289	51.9043		17	878.241	323.094	36.7888			14	8967882	2859228	31.883		19	8805388	1542692	17.5199		15	9878022
	slide number	21	14760485	6556845	44.4216		22	1186.72	588.313	49.5748		25	15323010	6277824	40.9699		21	7846273	974238	12.4166		19	7403062	1632539	22.0522		21	9567869	3904088	40.8042		21	8641614	1588270	18.3793			18	8125564	2845112	35.0143		21	8301716	1609284	19.385		21	10632900
	Each slide 3-5 sections
	Control	% Average	RAKO	% Average
	7840ctl	20.3487	8290ko	30.797		average	Infarct area	SEM	TTEST
	8288ctl	21.7725	7836ko	40.8911		CTL	24.9535	3.51256	0.0283767
	8296ctl	11.2216	8039ko	41.2019		RAKO	36.8865	3.56765
	9598ctl	44.715	9490ko	29.3968
	9492ctl	25.5591	10095ko	46.8825
	9491ctl	12.9005	10231ko	54.8955
	10661ctl	37.481	10033ko	27.9375
	10723ctl	16.9527	8295ko	33.1132
	11272ctl	22.3714	11269kodead	16.8931
	11274ctl	36.2123	11270kodead	46.856
[truncated: 5 more columns]
