# Supplementary material for: Retinoic acid signaling is directly activated in cardiomyocytes and protects mouse hearts from apoptosis after myocardial infarction
Source: eLife. 2021 Oct 8;10:e68280. doi: 10.7554/eLife.68280 (PMC8530512; doi:10.7554/eLife.68280)
Supplement: Figure 5—source data 2. [file elife-68280-fig5-data2.xlsx]

## Sheet: Sheet1
	TUNEL quantification Figure 5G
	7840ctl	DAPI	DAPI Left ventricle	TUNEL+ cells	%		8288ctl	DAPI	DAPI Left ventricle	TUNEL+ cells	%		8296ctl	DAPI	DAPI Left ventricle	TUNEL+ cells	%		9492ctl	DAPI	DAPI Left ventricle	TUNEL+ cells	%		9598ctl	DAPI	DAPI Left ventricle	TUNEL+ cells	%		9490CTL	DAPI	DAPI Left ventricle	TUNEL+ cells	%
	slide 1	35974	19097.4	341	1.78558		slide 1	37994	20169.8	400	1.98316		slide 1	36030	19127.2	114	0.596011		slide 1	23097	12261.5	66	0.538272		slide 1	37424	19867.2	320	0.855066		slide 1	27028	14348.3	216	1.5054
	slide 3	38016	20181.5	321	1.59057		slide 3	30929	16419.2	564	3.435		slide 3	37480	19896.9	439	2.20637		slide 3	27235	14458.2	81	0.560236		slide 3	40776	21646.7	408	1.00059		slide 3	29427	15621.9	450	2.88058
	slide 5	41077	21806.5	375	1.71967		slide 5	42463	22542.2	680	3.01656		slide 5	38884	20642.3	126	0.610398		slide 5	30498	16190.4	101	0.623826		slide 5	33665	17871.7	331	0.983217		slide 5	21255	11283.6	251	2.22447
	slide 7	41899	22242.8	315	1.41619		slide 7	35149	18659.5	299	1.6024		slide 7	32136	17060	99	0.580306		slide 7	31498	16721.3	464	2.77491		slide 7	36403	19325.2	506	1.39		slide 7	37056	19671.8	394	2.00286
	7836KO	DAPI	DAPI Left ventricle	TUNEL+ cells	%		8039KO	DAPI	DAPI Left ventricle	TUNEL+ cells	%		8290KO	DAPI	DAPI Left ventricle	TUNEL+ cells	%		9490ko	DAPI	DAPI Left ventricle	TUNEL+ cells	%		10095KO	DAPI	DAPI Left ventricle	TUNEL+ cells	%		10231KO	DAPI	DAPI Left ventricle	TUNEL+ cells	%
	slide 1	51633	27410.3	722	2.63405		slide 1	42739	22688.8	830	3.6582		slide 1	44419	23580.6	691	2.93037		slide 1	42355	22484.9	402	1.78787		slide 1	25851	13723.5	472	3.43936		slide 1	32794	17409.3	720	4.13572
	slide 3	50232	26666.6	888	3.33001		slide 3	38523	20450.6	810	3.96076		slide 3		20498	268	1.30744		slide 3	35607	18902.6	140	0.740638		slide 3	30184	16023.7	619	3.86302		slide 3	28954	15370.8	591	3.84496
	slide 5	51533	27357.2	722	2.63916		slide 5	42734	22686.1	949	4.18318		slide 5	44419	23580.6	691	2.93037		slide 5	35707	18955.7	254	1.33997		slide 5	21071	11185.9	397	3.5491		slide 5	30646	16269	555	3.4114
	slide 7	50332	26719.6	888	3.3234		slide 7	52855	28059	862	3.07209		slide 7		22520.1	1025	4.55149		slide 7	32861	17444.9	272	1.5592		slide 7	27494	14595.7	543	3.72028		slide 7	30635	16263.1	495	3.04369
	each slide 3-5 sections
	ctl	% Average		RAKO	% Average			TUNEL+ area	SEM	ttest
	7840	1.628		7836	2.98165		CTL	1.5784	0.259096	0.00973076
	8288	2.50928		8039	3.71856		RAKO	3.03982	0.364964
	8296	0.998271		8290	2.92992
	9492	1.12431		9490	1.35692
	9598	1.05722		10095	3.64294
	9490	2.15333		10231	3.60895
